# Supplementary material for: Adsorption Characteristics of Dimethylated Arsenicals on Iron Oxide–Modified Rice Husk Biochar
Source: MDPI journal article supplement (doi:10.3390/toxics10110703), 2022-11-17
Supplement: s1 [file s1]

# Supplementary Materials:

## Adsorption characteristics of dimethylated arsenicals on iron oxide-modified rice husk biochar

Sang-Gyu Yoon<sup>1</sup>, Ihn-Sil Kwak<sup>2</sup>, Hye-On Yoon<sup>3\*</sup>, Jinsung An<sup>4\*</sup>

**Table S1.** Parameters obtained through Langmuir model, Freundlich model, and Temkin model after isothermal adsorption experiments for each As species on FeBC

| Model      | Equation                            | Parameter                                                  | As(V) | DMA(V) | DMMTA(V) | DMDTA(V) |
|------------|-------------------------------------|------------------------------------------------------------|-------|--------|----------|----------|
| Langmuir   | $q_e = \frac{q_m b C_e}{1 + b C_e}$ | $q_m$ (mg/g)                                               | 6.32  | 7.08   | 0.430    | 0.280    |
|            |                                     | $b$ (L/mg)                                                 | 0.023 | 0.002  | 0.013    | 0.115    |
|            |                                     | $R^2$                                                      | 0.684 | 0.792  | 0.508    | 0.772    |
| Freundlich | $q_e = K_F C_e^{1/n_f}$             | $K_F$<br>( $\text{mg}^{(1-1/n)} \text{L}^{1/n}/\text{g}$ ) | 1.83  | 0.286  | 0.009    | 0.050    |
|            |                                     | $n_f$                                                      | 5.65  | 2.65   | 1.38     | 2.42     |
|            |                                     | $R^2$                                                      | 0.682 | 0.671  | 0.466    | 0.688    |
| Temkin     | $q_e = \frac{RT}{B} \ln A_T C_e$    | $B$ (kJ/mol)                                               | 2.49  | 1.95   | 47.4     | 45.6     |
|            |                                     | $A_T$ (L/mol)                                              | 0.597 | 0.031  | 0.439    | 1.51     |
|            |                                     | $R^2$                                                      | 0.789 | 0.725  | 0.391    | 0.748    |

$K_F$ : the Freundlich constant

$n_f$ : the heterogeneity factor

$B$ : the constant related to the adsorption heat

$A_T$ : the equilibrium binding constant
